# Supplementary material
Source: publisher figshare collection journal article supplement (https://acs.figshare.com/ndownloader/files/5737557)
Supplement: Supplementary file 1 [file 5737557]

# A new angle on heat capacity changes in hydrophobic solvation (Supporting Information)

*Kelly R. Gallagher and Kim A. Sharp\*.*

Johnson Research Foundation and Dept. of Biochemistry and Biophysics, University of Pennsylvania,  
Philadelphia, Pennsylvania, 19104, USA.

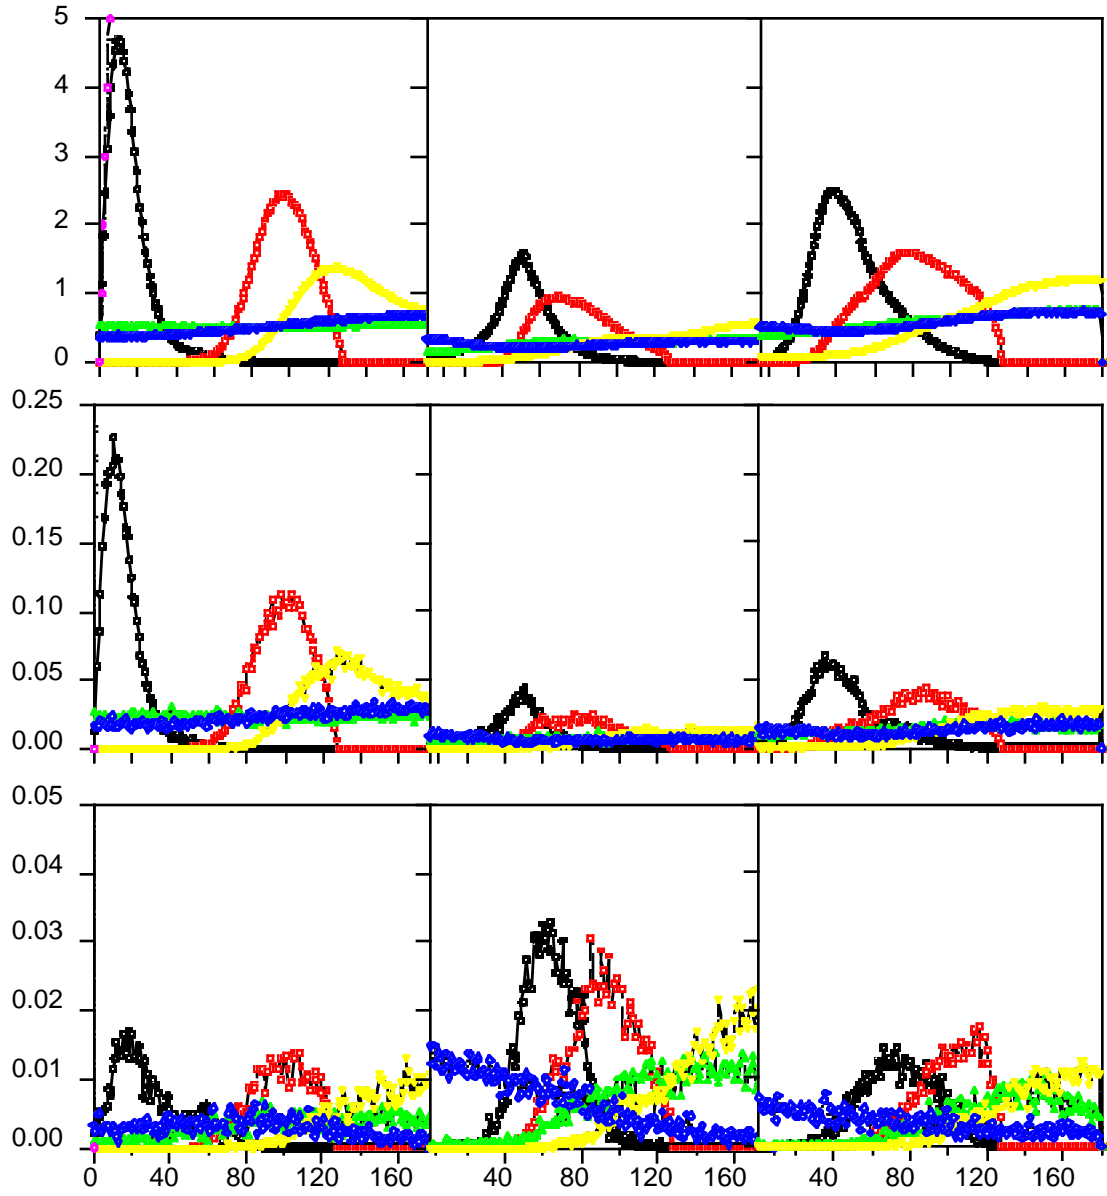

Plots of  $\theta$  (●) and the secondary water-water orientation angles  $\psi$  (■),  $\phi$  (▲),  $\chi$  (▼), and  $\omega$  (◆) at  $r=2.8 \text{ \AA}$  (Left),  $3.5 \text{ \AA}$  (Center) and  $4.4 \text{ \AA}$  (Right) for pure water (Upper), 1<sup>st</sup>-1<sup>st</sup> shell of argon (Middle) and 1<sup>st</sup>-1<sup>st</sup> shell of  $K^+$  (Lower)

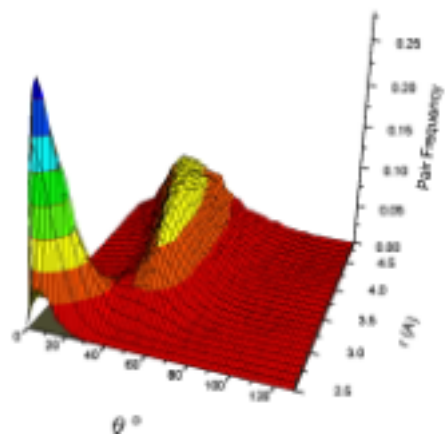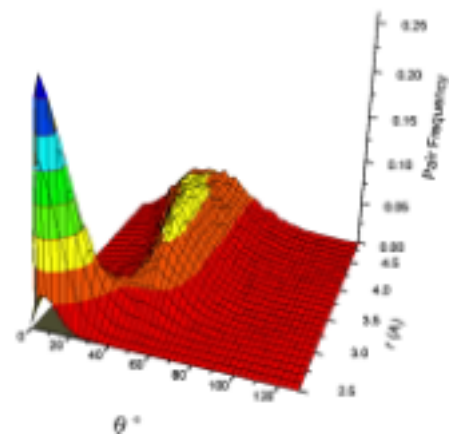

$\rho(r, \theta)$  plots for 1<sup>st</sup>-2<sup>nd</sup> shell waters pairs around argon and  $K^+$ .
